# Supplementary material for: NiCo2O4 nanowire arrays supported on Ni foam for high-performance flexible all-solid-state supercapacitors
Source: Royal Society of Chemistry journal article supplement (doi:10.1039/c2ta01283a), 2012-12-18
Supplement: c2ta01283a.pdf [file c2ta01283a.pdf]

Electronic Supplementary Information for

## NiCo<sub>2</sub>O<sub>4</sub> nanowire arrays supported on Ni foam for high-performance flexible all-solid-state supercapacitor

Qiufan Wang, Xianfu Wang, Bin Liu, Gang Yu, Xiaojuan Hou, Di Chen\* and Guozhen Shen\*

Wuhan National Laboratory for Optoelectronics, Huazhong University of Science and Technology, Wuhan 430074, China. Fax: 86 27 87792225; E-mail: [gzshen@mail.hust.edu.cn](mailto:gzshen@mail.hust.edu.cn); [dichen@mail.hust.edu.cn](mailto:dichen@mail.hust.edu.cn).

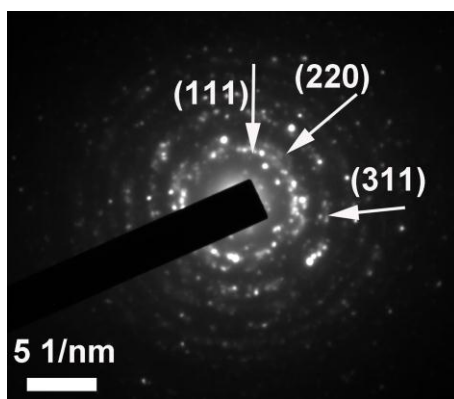

Fig. S1 SAED pattern of the NCO nanowire arrays grown on Ni foam.

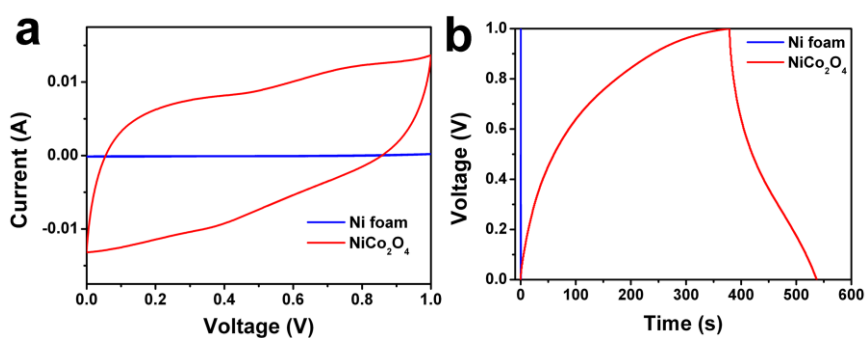

Fig. S2 (a) CV curves (20 mV/s) and GCD curves (1 A/g) of pure Ni foam electrode and NiCo<sub>2</sub>O<sub>4</sub>/Ni foam electrode, respectively.

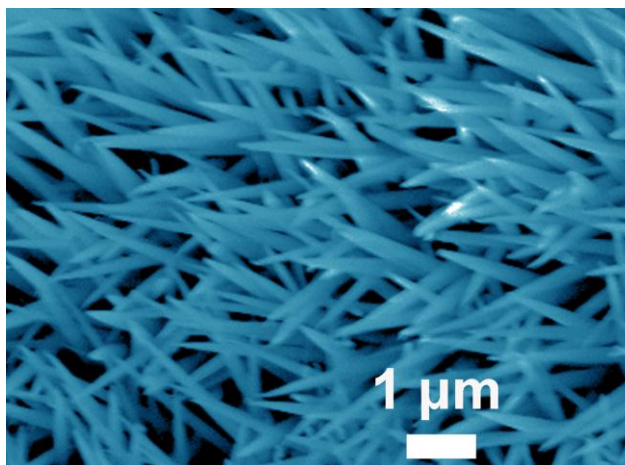

**Fig. S3** SEM image of the NCO/Ni foam after bending test.

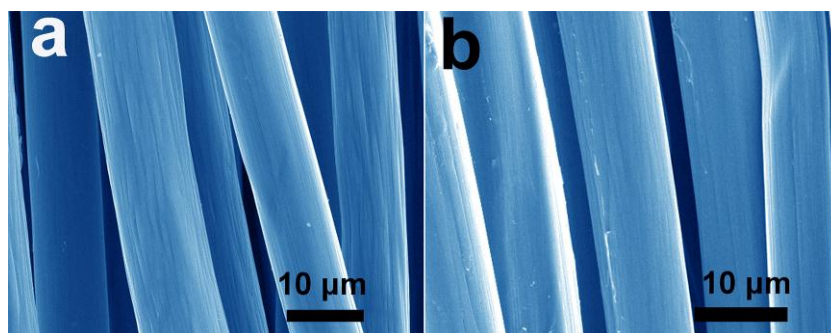

**Fig. S4** SEM images of the pure carbon cloth (a) before and (b) after calcinations at 400 °C.
